# Supplementary material for: Melatonin Treatment Maintains the Quality of Fresh-Cut Gastrodia elata under Low-Temperature Conditions by Regulating Reactive Oxygen Species Metabolism and Phenylpropanoid Pathway
Source: MDPI journal article supplement (doi:10.3390/ijms241814284), 2023-09-19
Supplement: s1 [file s1]

# **Melatonin Treatment Maintains the Quality of Fresh-Cut *Gastrodia elata* under Low-Temperature Conditions by Regulating Reactive Oxygen Species Metabolism and Phenylpropanoid Pathway**

Boyuan Dong <sup>1,2,\*</sup>, Fangfang Da <sup>1,2</sup>, Yulong Chen <sup>1,2</sup> and Xiaochun Ding <sup>3,\*</sup>

**Supplementary material**

**Table S1** Primer sequences used for real-time PCR.

| GENE           | PRIMER SEQUENCE                                                          |
|----------------|--------------------------------------------------------------------------|
| <i>GeSOD</i>   | Forward: GAGGGCTTTGTTGAAGTTTGTGATG<br>Reverse: CCTTCCTGATTTGCCATACGACTAC |
| <i>GeCAT</i>   | Forward: CTTGCCTTCTGCCCCGTCAATC<br>Reverse: GCATTTGGAGGGAGCATGAGATAG     |
| <i>GePOD</i>   | Forward: GCTGTGATGCCTCAATTATGCTTG<br>Reverse: GCCTCTAGCTGTGTCTTGATTCTG   |
| <i>GePPO</i>   | Forward: GCCAACATCGACCGCATCTG<br>Reverse: TCTCTGACTCTGACCCTAACTAGC       |
| <i>GeAPX</i>   | Forward: CGTAAGGGCGGAAAACCTGGATC<br>Reverse: GAGCTGCTGAAAGGAGAATCGG      |
| <i>GeGR</i>    | Forward: TTGAAGCTAACAGAGTTGAGGTGAC<br>Reverse: ACGGCTCCCAGTTGCAATTAAG    |
| <i>GeMDHAR</i> | Forward: ACCTGCCGTACTTCTACTCTCG<br>Reverse: GACCACCCTCCCATCCTTGAC        |
| <i>GeDHAR</i>  | Forward: ACCACTCTGGTTTGTTCGCA<br>Reverse: ACTGAGCAACAACACTCCGT           |
| <i>GePAL</i>   | Forward: CCCAGGTCTCGTGCGTCGTTCT<br>Reverse: TTTTACCTCTTGCCCCGTGCGTT      |
| <i>GeC4H</i>   | Forward: CAGAGCCAGACACGCACAAGC<br>Reverse: TAGGGAGACGACCACGGAGTG         |
| <i>Ge4CL</i>   | Forward: CCTCGGCTGCTGACTGACTG<br>Reverse: GGTTGCGTTGGTCTCGCCTC           |
| <i>GeActin</i> | Forward: GCGACAATGGAACCTGGAATGG<br>Reverse: TCGCCAGAATCCAGCACAAT         |
